# Supplementary material
Source: PubMed Central journal article supplement (PMC2447141)
Supplement: supp_28_13_4407__1.pdf [file supp_28_13_4407__1.pdf]

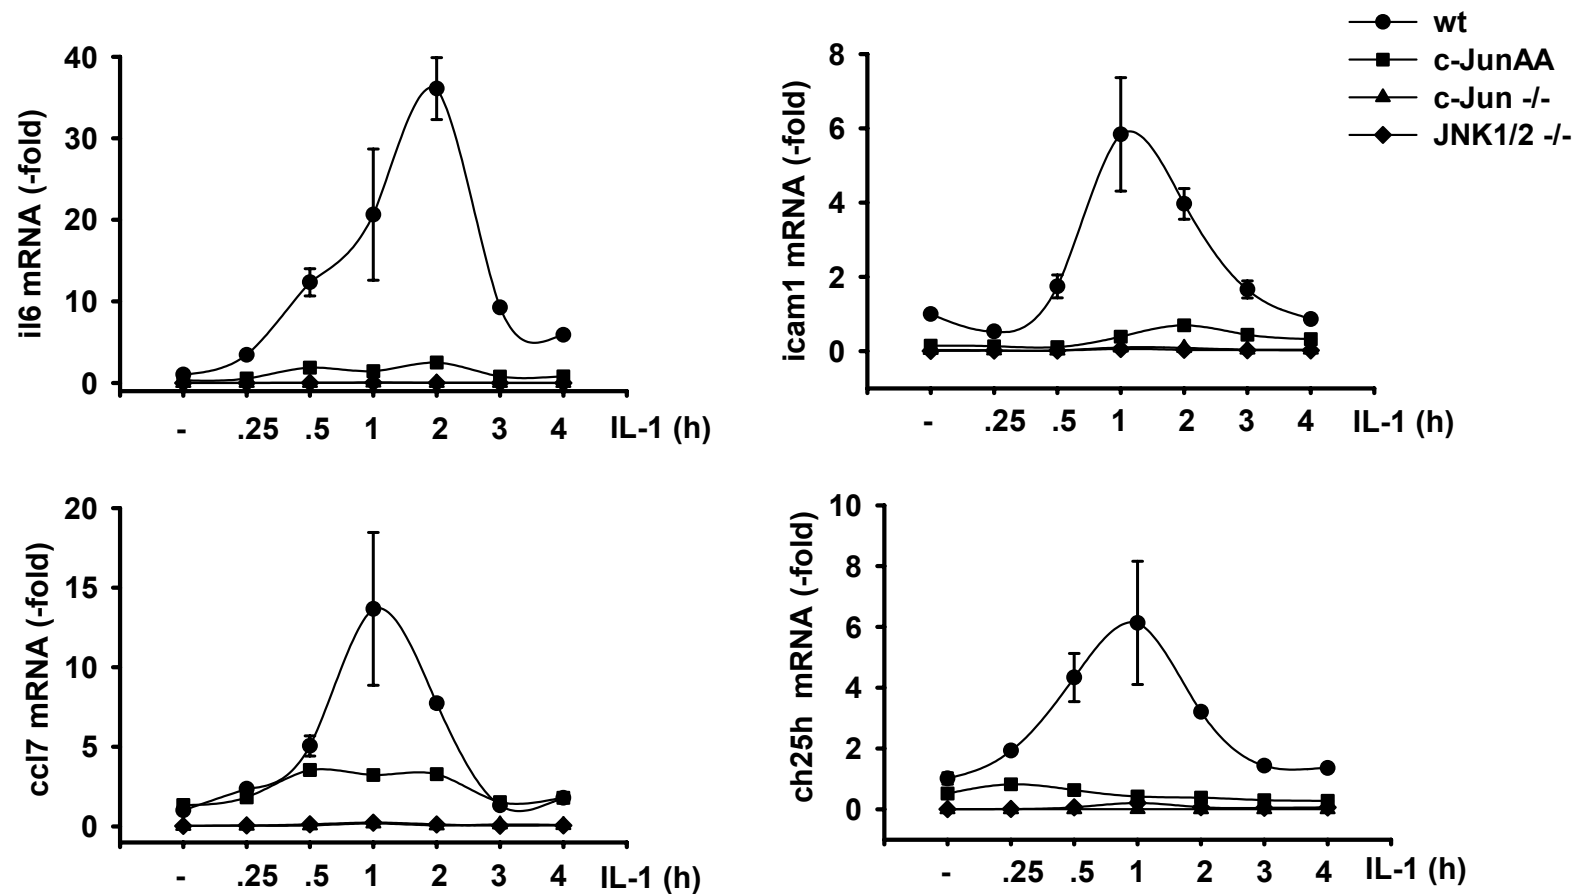

**Validation of DNA micorarray experiments using real time PCR.**

RNAs obtained as in Fig.1D) were analysed for expression of *il6* (Mm00446190\_m1), *icam1* (Mm00516023\_m1), *ccl7* (Mm00443113\_m1) and *ch25h* (Mm00515483\_s1) by real time PCR using Taqman assays indicated in brackets. Shown is the mean mRNA expression +/- S.E.M. from two experiments relative to the unstimulated wild type control cells.
